# Supplementary material for: Synthesis, Spectral Characterization, and Structural Modelling of Di- and Trinuclear Iron(III) Monensinates with Different Bridging Patterns
Source: MDPI journal article supplement (doi:10.3390/inorganics12040114), 2024-04-15
Supplement: s1 [file s1]

# Synthesis, Spectral Characterization, and Structural Modelling of Di- and Trinuclear Iron(III) Monensinates with Different Bridging Patterns

Nikolay Petkov <sup>1,\*</sup>, Alia Tadjer <sup>1</sup>, Svetlana Simova <sup>2</sup>, Zara Cherkezova-Zheleva <sup>3</sup>, Daniela Paneva <sup>3</sup>, Radostina Stoyanova <sup>4</sup>, Rositsa Kukeva <sup>4</sup>, Petar Dorkov <sup>5</sup> and Ivayla Pantcheva <sup>1,\*</sup>

<sup>1</sup> Faculty of Chemistry and Pharmacy, Sofia University St. Kliment Ohridski, 1164 Sofia, Bulgaria; tadjer@chem.uni-sofia.bg

<sup>2</sup> Institute of Organic Chemistry with Centre of Phytochemistry, Bulgarian Academy of Sciences, 1113 Sofia, Bulgaria; svetlana.simova@orgchm.bas.bg

<sup>3</sup> Institute of Catalysis, Bulgarian Academy of Sciences, 1113 Sofia, Bulgaria; zzhel@ic.bas.bg (Z.C.-Z.); daniela@ic.bas.bg (D.P.)

<sup>4</sup> Institute of General and Inorganic Chemistry, Bulgarian Academy of Sciences, 1113 Sofia, Bulgaria; radstoy@svr.igic.bas.bg (R.S.); rositsakukeva@yahoo.com (R.K.)

<sup>5</sup> Research and Development Department, Biovet Ltd., 4550 Peshtera, Bulgaria; p\_dorkov@biovet.com

\* Correspondence: ahnp@chem.uni-sofia.bg (N.P.); ahip@chem.uni-sofia.bg (I.P.); Tel.: +359-2-8161446 (N.P. & I.P.)

## Supporting information

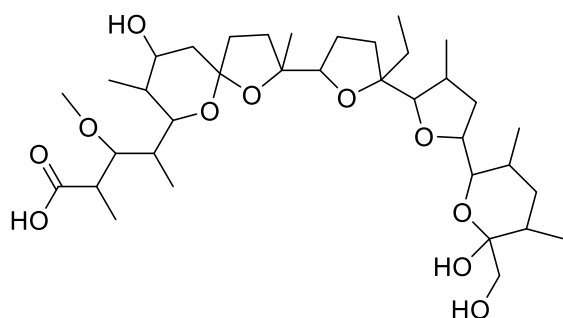

**Figure S1.** Structure of monensin.

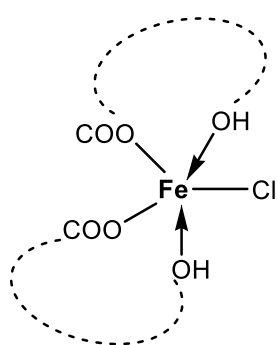

**Figure S2.** Proposed structure of mono-complex **1a**.

**Table S1.**  $^{13}\text{C}$ -NMR chemical shift ( $\delta$ , ppm) of monensic acid and complex **1** in  $\text{CDCl}_3$  ( $\Delta = \delta_1 - \delta_{\text{MonH}}$ ).

| Carbon | MonH $\times$ H $_2$ O | <b>1</b> | $\Delta$ |  | Carbon | MonH $\times$ H $_2$ O | <b>1</b> | $\Delta$ |
|--------|------------------------|----------|----------|--|--------|------------------------|----------|----------|
| 1      | 177.6                  | 177.4    | -0.2     |  | 19     | 32.8                   | 32.7     | -0.1     |
| 2      | 42.3                   | 42.2     | -0.1     |  | 20     | 77.4                   | 77.3     | -0.1     |
| 3      | 81.8                   | 81.7     | -0.1     |  | 21     | 74.0                   | 73.9     | -0.1     |
| 4      | 36.9                   | 36.8     | -0.1     |  | 22     | 33.1                   | 33.0     | -0.1     |
| 5      | 67.3                   | 67.1     | -0.2     |  | 23     | 36.9                   | 36.8     | -0.1     |
| 6      | 34.8                   | 34.7     | -0.1     |  | 24     | 35.8                   | 35.7     | -0.1     |
| 7      | 70.9                   | 70.8     | -0.1     |  | 25     | 97.5                   | 97.3     | -0.2     |
| 8      | 34.4                   | 34.3     | -0.1     |  | 26     | 68.1                   | 68.0     | -0.1     |
| 9      | 108.1                  | 108.0    | -0.1     |  | 27     | 15.9                   | 15.9     | 0.0      |
| 10     | 38.6                   | 38.5     | -0.1     |  | 28     | 58.3                   | 58.2     | -0.1     |
| 11     | 34.0                   | 33.9     | -0.1     |  | 29     | 10.6                   | 10.5     | -0.1     |
| 12     | 85.4                   | 85.3     | -0.1     |  | 30     | 11.0                   | 10.9     | -0.1     |
| 13     | 83.7                   | 83.6     | -0.1     |  | 31     | 28.1                   | 27.9     | -0.2     |
| 14     | 28.0                   | 27.9     | -0.1     |  | 32     | 31.4                   | 31.3     | -0.1     |
| 15     | 31.8                   | 31.7     | -0.1     |  | 33     | 8.8                    | 8.7      | -0.1     |
| 16     | 86.8                   | 86.6     | -0.2     |  | 34     | 16.0                   | 15.8     | -0.2     |
| 17     | 85.1                   | 85.0     | -0.1     |  | 35     | 17.8                   | 17.7     | -0.1     |
| 18     | 34.6                   | 34.6     | 0.0      |  | 36     | 16.7                   | 16.6     | -0.1     |

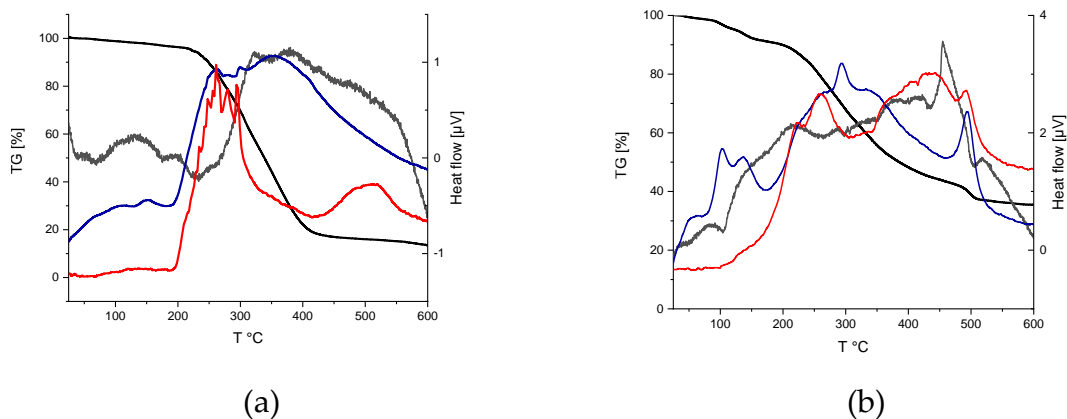

**Figure S3.** TG-DTA/MS curves of (a) complex 1 and (b) complex 2.

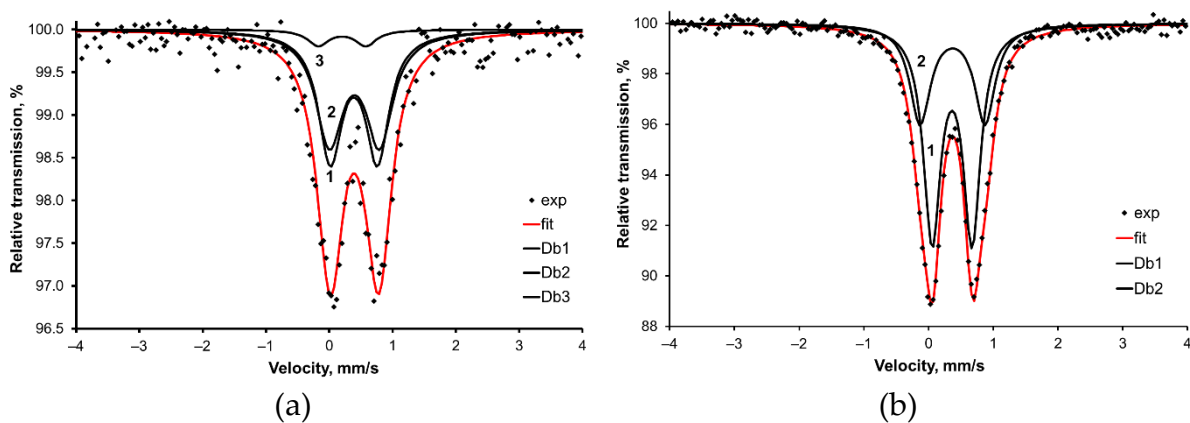

**Figure S4.** Mössbauer spectra at 77 K: (a) complex 1, (b) complex 2.

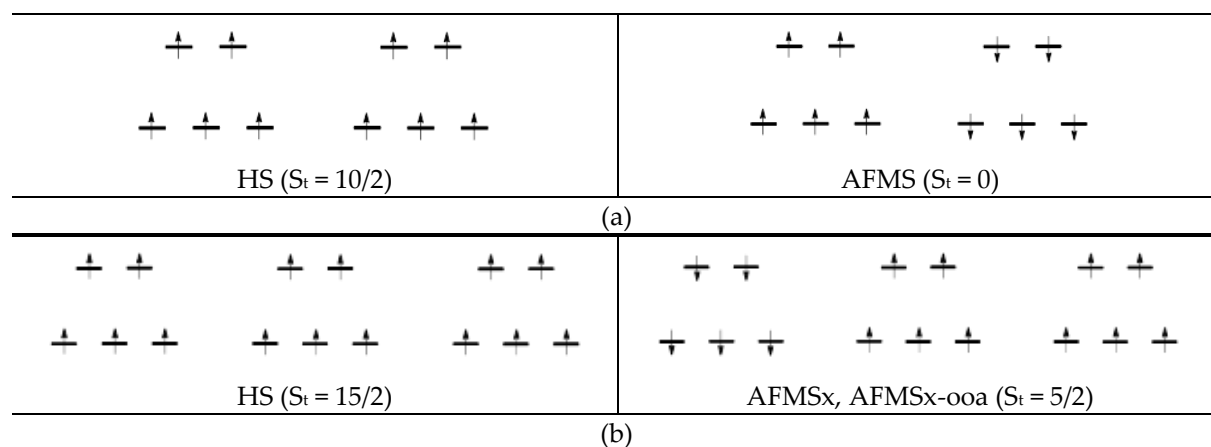

**Scheme S1.** Electron configurations of the iron ions in (a) complex 1 and (b) complexes 2.
